# Supplementary material for: Cytomorphology Unmasks Occult Mycobacterium colombiense Coinfection in Talaromyces marneffei Infection: First Case Report and Systematic Review of 26 Cases (2008-2024)
Source: Research Square preprint supplement (doi:10.21203/rs.3.rs-7686418/v1), 2025-10-26
Supplement: Supplementary file 1 [file 1717e425db9e296f09dd1450.docx]

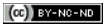

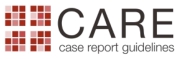


**CARE Checklist of information to include when writing a case report**

**Topic** **Item** **Checklist item description** **Reported on Line**

**Title** **1** The diagnosis or intervention of primary focus followed by the words “case report” . . . . . . . . . . . . . . . . . . . . . . . . . . Line 2

**Key Words** **2** 2 to 5 key words that identify diagnoses or interventions in this case report, including "case report" . . . Line 35-36

**Abstract**

**(no references)**

**3a** Introduction: What is unique about this case and what does it add to the scientific literature? . . . . . . . . . . . . . . . . Line 13-14

**3b** Main symptoms and/or important clinical findings . . . . . . . . . . . . . . . . . . . . . . . . . . . . . . . . . . . . . . . . . . . . . . . . . . . . . . . Line 18-19

**3c** The main diagnoses, therapeutic interventions, and outcomes . . . . . . . . . . . . . . . . . . . . . . . . . . . . . . . . . . . . . . . . . . . Line 29-30

**3d** Conclusion—What is the main “take-away” lesson(s) from this case? . . . . . . . . . . . . . . . . . . . . . . . . . . . . . . . . . . . . . Line 29-34

**Introduction** **4** One or two paragraphs summarizing why this case is unique (**may include references**) . . . . . . . . . . . . Line 38-46

**Patient Information**

**5a** De-identified patient specific information. . . . . . . . . . . . . . . . . . . . . . . . . . . . . . . . . . . . . . . . . . . . . . . . . . . . Line 48

**5b** Primary concerns and symptoms of the patient. . . . . . . . . . . . . . . . . . . . . . . . . . . . . . . . . . . . . . . . . . . . . . . . . . . . . Line 48-52

**5c** Medical, family, and psycho-social history including relevant genetic information . . . . . . . . . . . . . . . . . Line 48,52

**5d** Relevant past interventions with outcomes . . . . . . . . . . . . . . . . . . . . . . . . . . . . . . . . . . . . . . . . . . . . . . . . . . . . . . . . Line 49-50

**Clinical Findings**

**Timeline**

**6**

**7**

Describe significant physical examination (PE) and important clinical findings. . . . . . . . . . . . . . . . . . . . . . . Line 51-65

Historical and current information from this episode of care organized as a timeline . . . . . . . . . . . . . . . Line 48-73

**Diagnostic**

**Assessment**

**Therapeutic**

**Intervention**

**Follow-up and Outcomes**

**8a** Diagnostic testing (such as PE, laboratory testing, imaging, surveys). . . . . . . . . . . . . . . . . . . . . . . . . . . . . . . Line 53-65

**8b** Diagnostic challenges (such as access to testing, financial, or cultural) . . . . . . . . . . . . . . . . . . . . . . . . . . . . . Line 59-60

**8c** Diagnosis (including other diagnoses considered) . . . . . . . . . . . . . . . . . . . . . . . . . . . . . . . . . . . . . . . . . . . . . . . . . Line 59-73

**8d** Prognosis (such as staging in oncology) where applicable . . . . . . . . . . . . . . . . . . . . . . . . . . . . . . . . . . . . . . . . . Line 71-73 ,96-97

**9a** Types of therapeutic intervention (such as pharmacologic, surgical, preventive, self-care) . . . . . . . . . . . . . . . . . . . . Line 66-71

**9b** Administration of therapeutic intervention (such as dosage, strength, duration) . . . . . . . . . . . . . . . . . . . . . . . . . . . . . Line 66-71

**9c** Changes in therapeutic intervention (with rationale) . . . . . . . . . . . . . . . . . . . . . . . . . . . . . . . . . . . . . . . . . . . . . . . . . . . . Line 66-73

**10a** Clinician and patient-assessed outcomes (if available) . . . . . . . . . . . . . . . . . . . . . . .. . . . . . . . . . . . . . . . . . . . . . . . . . . . Line 71-73

**10b** Important follow-up diagnostic and other test results . . . . . . . . . . . . . . . . . . . . . . . . . . . . . . . . . . . . . . . . . . . . . . . . . . . . Line 71-73

**10c** Intervention adherence and tolerability (How was this assessed?) . . . . . . . . . . . . . . . . . . . . . . . . . . . . . . . . . . . . . . . . . Line 66-71

**10d** Adverse and unanticipated events . . . . . . . . . . . . . . . . . . . . . . . . . . . . . . . . . . . . . . . . . . . . . . . . . . . . . . . . . . . . . . . . . . . Line 69-71

**Discussion**

**11a** A scientific discussion of the strengths AND limitations associated with this case report . . . . . . . . . . . . . . . . . . . . . . . Line 133-139

**11b** Discussion of the relevant medical literature **with references**. . . . . . . . . . . . . . . . . . . . . . . . . . . . . . . . . . . . . . . . . . Line 106-109

**11c** The scientific rationale for any conclusions (including assessment of possible causes) . . . . . . . . . . . . . . . . . . . . . . . . Line 133-139

**11d** The primary “take-away” lessons of this case report (without references) in a one paragraph conclusion . . . . . . . Line 133-139

**Patient Perspective** **12** The patient should share their perspective in one to two paragraphs on the treatment(s) they received . . . . . . . . N/A

**Informed Consent** **13** Did the patient give informed consent? Please provide if requested . . . . . . . . . . . . . . . . . . . . . . . . . . . . . . . . . . . . . . Line 159-162

**Yes. ☑︎ No.**
